# Supplementary material for: Biomimetic synthesis of C3N4/TiO2/Ag nanosheet composites with high visible-light photocatalytic performance
Source: Royal Society of Chemistry journal article supplement (doi:10.1039/c5ra06980g), 2015-01-01
Supplement: c5ra06980g1.pdf [file c5ra06980g1.pdf]

## Supporting information

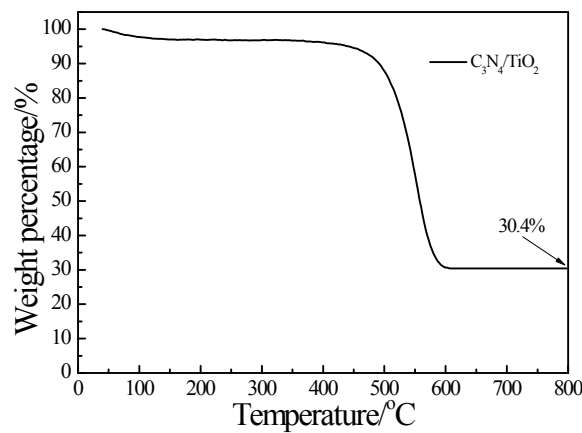

Fig. S1 TGA curves of the as-prepared  $C_3N_4/TiO_2$  sample.

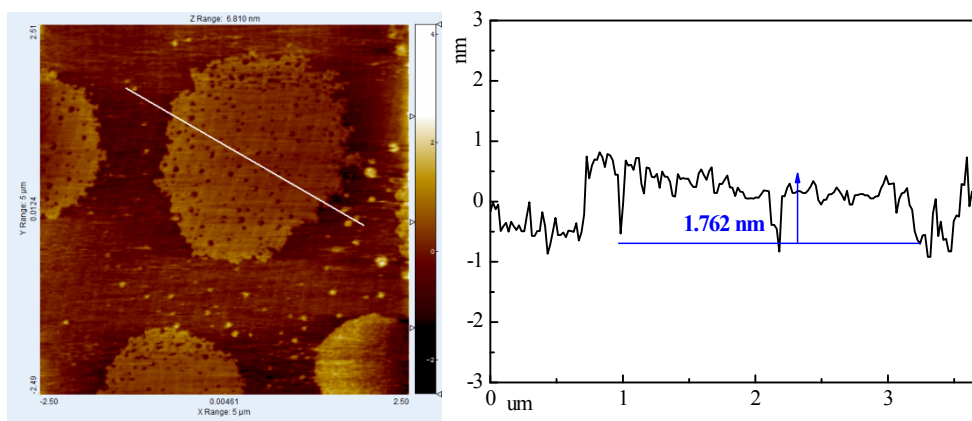

Fig. S2 AFM image and height profile of  $C_3N_4$  nanosheet on a silicon wafer.

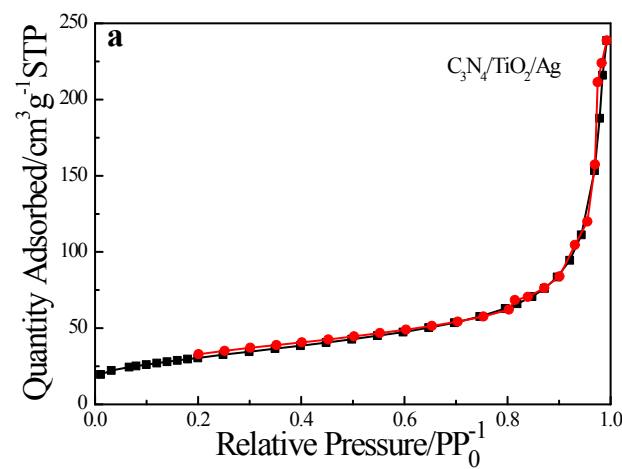

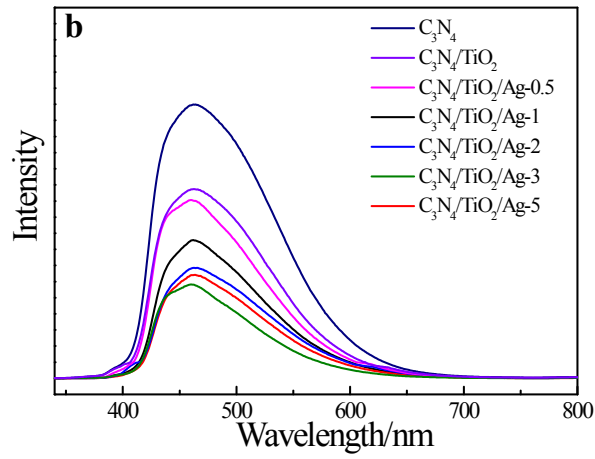

Fig. S3 (a) Nitrogen adsorption-desorption isotherms of  $C_3N_4/TiO_2/Ag-3$  sample; (b) PL spectra of  $C_3N_4$ ,  $C_3N_4/TiO_2$  and  $C_3N_4/TiO_2/Ag$  samples.

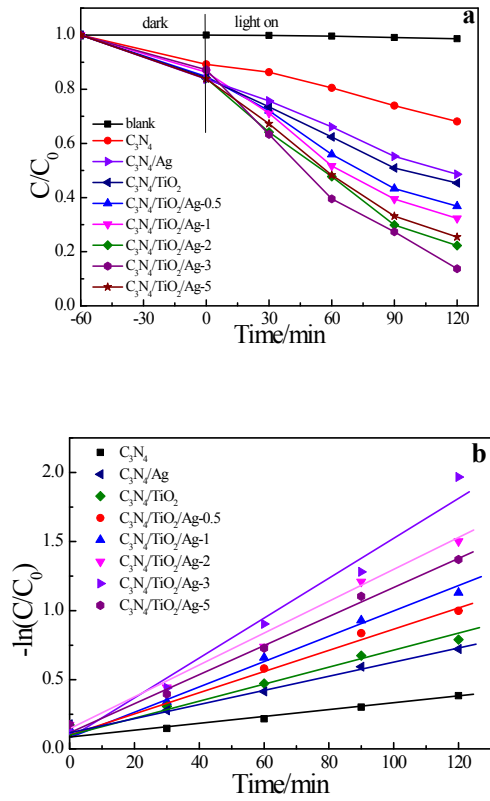

Fig. S4 (a) Photocatalytic degradation of MB over  $C_3N_4$ ,  $C_3N_4/Ag$ ,  $C_3N_4/TiO_2$  and  $C_3N_4/TiO_2/Ag$  under visible-light irradiation, and (b) their corresponding kinetic simulation curves.

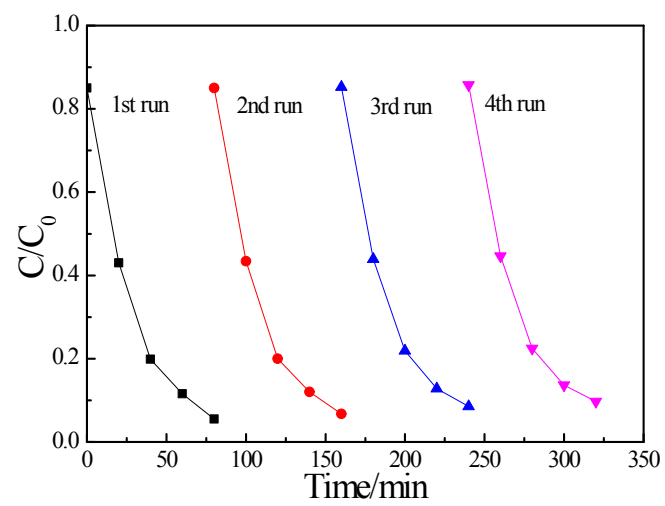

Fig. S5 Cycle runs of  $C_3N_4/TiO_2/Ag-3$  photocatalyst for RhB degradation under visible-light irradiation.
